# Supplementary material for: Synthesis and assessment of new cationic gemini surfactants as inhibitors for carbon steel corrosion in oilfield water
Source: Royal Society of Chemistry journal article supplement (doi:10.1039/c7ra07176k), 2017-01-01
Supplement: c7ra07176k1.pdf [file c7ra07176k1.pdf]

# **Synthesis and assessment of new cationic Gemini surfactants as inhibitors for carbon steel corrosion in oilfield water**

F. El-Taib Heakal<sup>1\*</sup>, A.E. Elkholy<sup>2</sup>, M.A. Deyab<sup>2</sup>, M.M. Osman<sup>2</sup>, M.I. Nessim<sup>2</sup>

<sup>1</sup>*Chemistry Department, Faculty of Science, Cairo University, 12613 Giza, Egypt*

<sup>2</sup>*Department of Analysis and Evaluation, Egyptian Petroleum Research Institute, 11727 Cairo, Egypt*

\*Corresponding author. Tel.: +20 1002449048; Fax: +20 35727556; +20 35728843

E-mail address: [fakihheakal@yahoo.com](mailto:fakihheakal@yahoo.com); [feltaibheakal@gmail.com](mailto:feltaibheakal@gmail.com)

Petrol-1 #83-1290 RT: 0.30-4.42 AV: 1208 NL: 1.00E5  
T: {0,0} + c EI Full ms

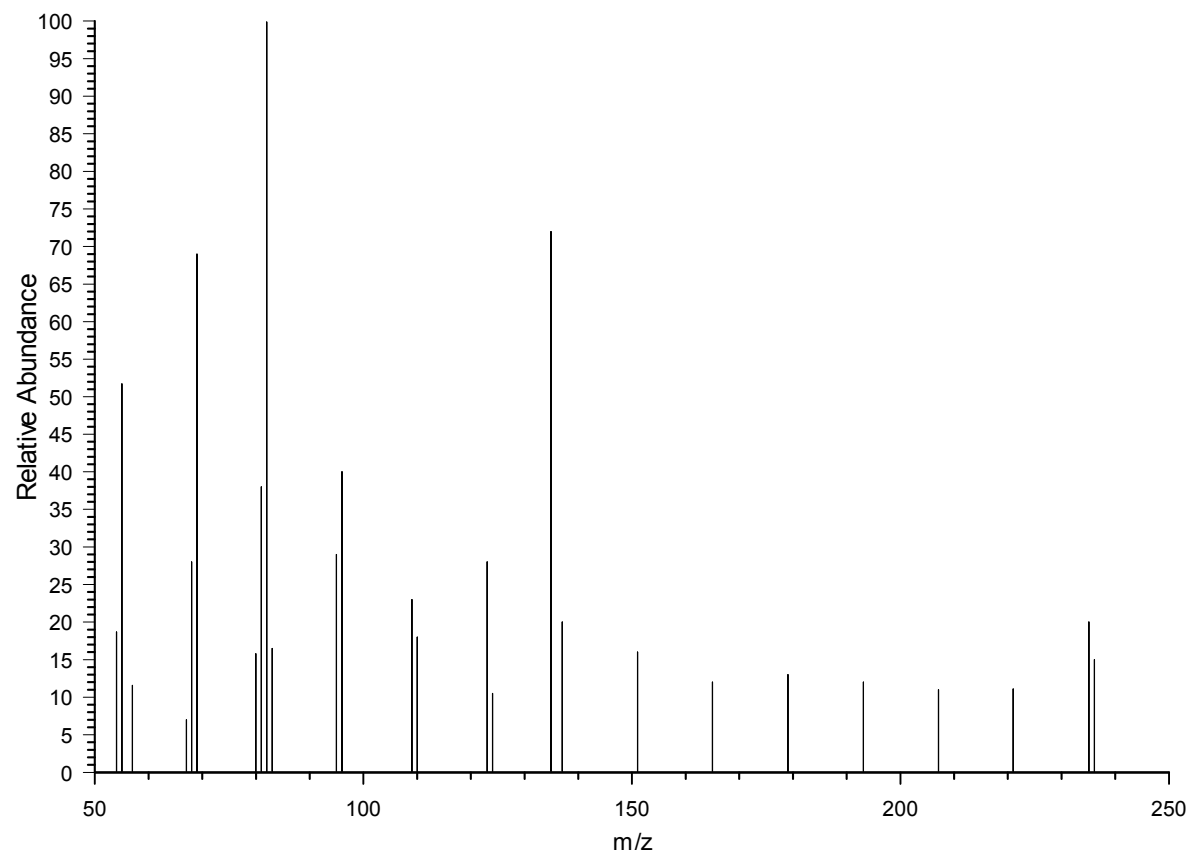

**Fig. S 1:** Mass spectrum of the intermediate compound.

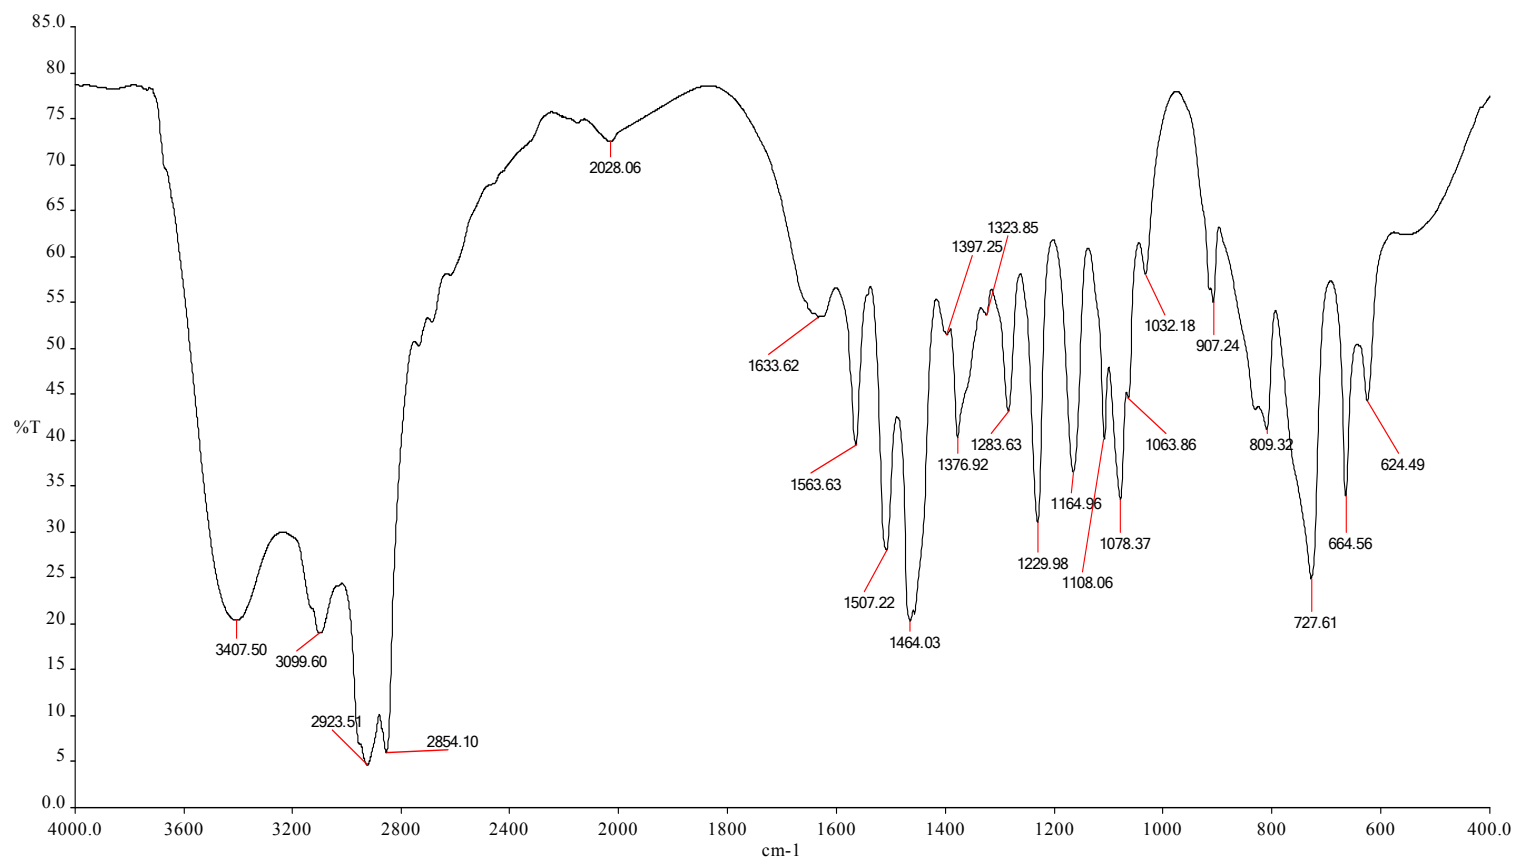

**Fig. S 2:** FT-IR spectrum of the intermediate compound.

IsmaeelAbdulShafy-1-CDC13-H1  
 Archive directory: /export/home/vnmr1/vnmrsys/data  
 Sample directory: D05mm\_test\_12Mar2014-21:34:40  
 Pulse Sequence: s2pu1  
 Solvent: CDC13  
 Temp. 30.0 C / 303.1 K  
 File: IsmaeelAbdulShafy-1-CDC13-H1  
 Mercury-300BB "NMR300"  
 Relax. delay 1.000 sec  
 Pulse 12.0 degrees  
 Acq. time 4.004 sec  
 Width 6600.7 Hz  
 32 repetitions  
 OBSERVE H1, 300.0673634 MHz  
 DATA PROCESSING  
 Line broadening 0.9 Hz  
 FT size 65536  
 Total time 36 min, 56 sec  
 Date: Sep 5 2017

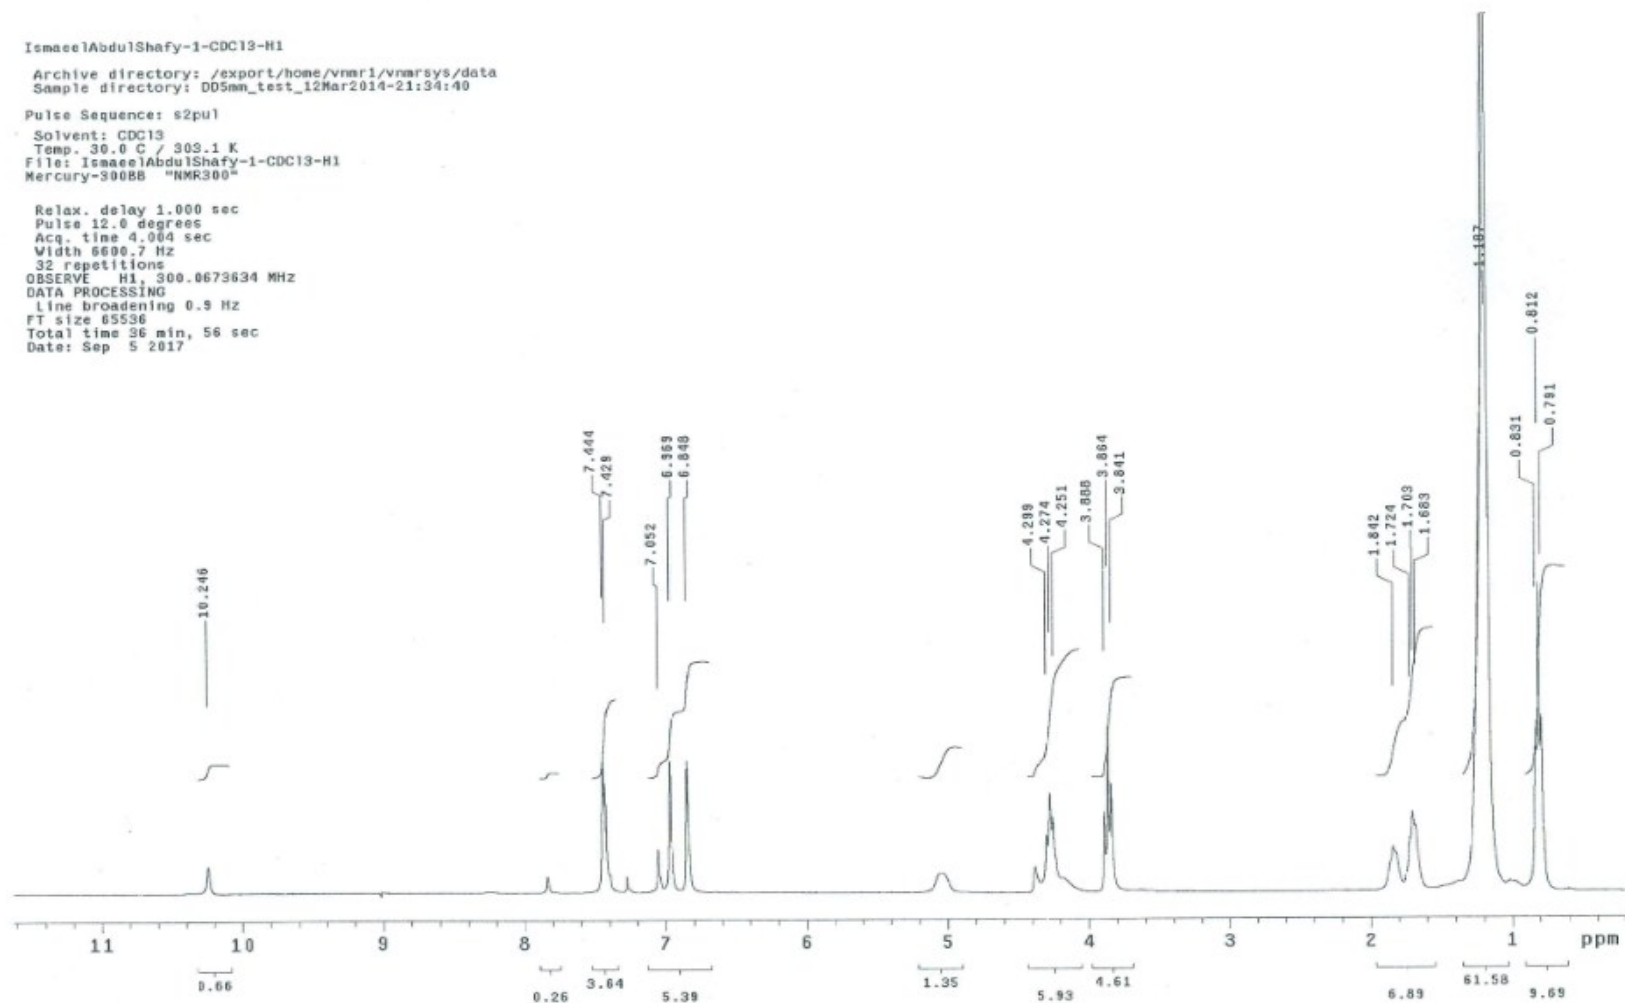

Fig. S 3: <sup>1</sup>H-NMR spectrum of the intermediate compound.

Petrol-2 #83-1290 RT: 0.31-4.42 AV: 1208 NL: 1.00E5  
T: {0,0} + c EI Full ms

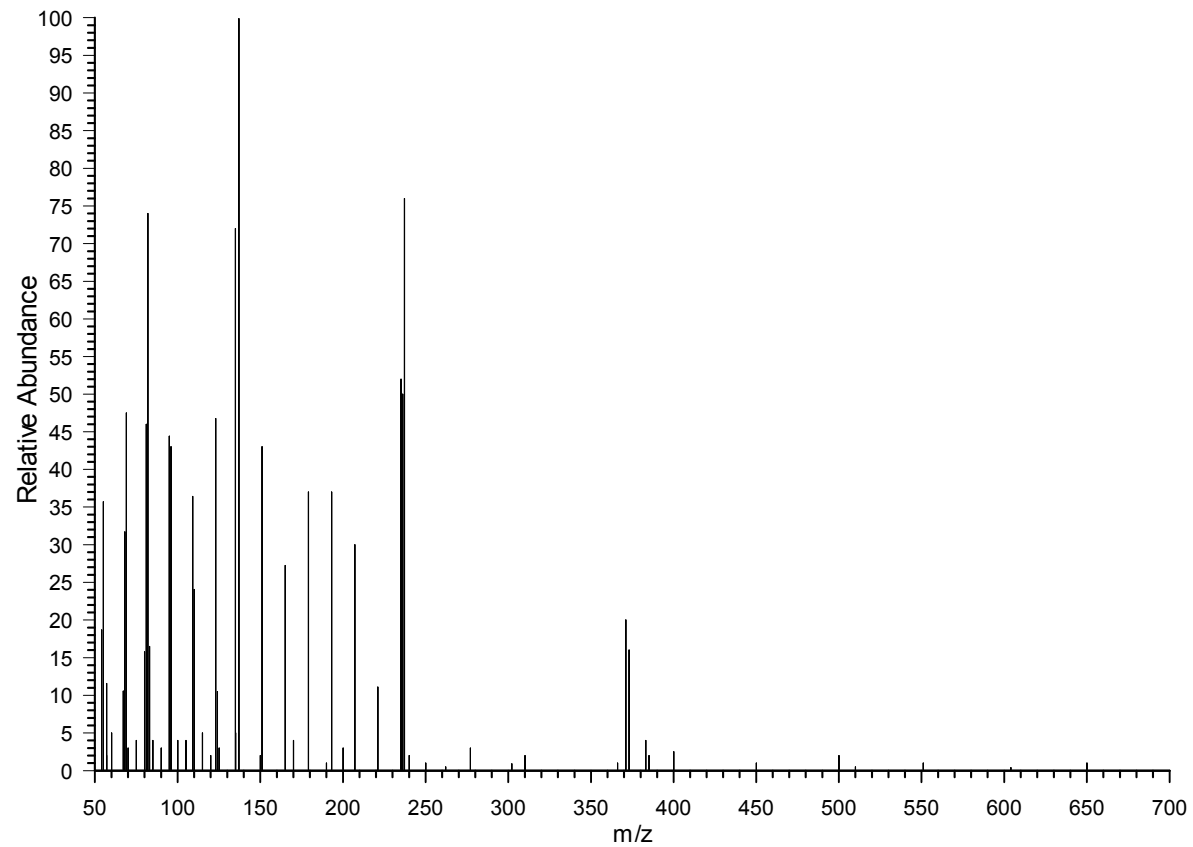

Fig. S 4: Mass spectrum of GS2.

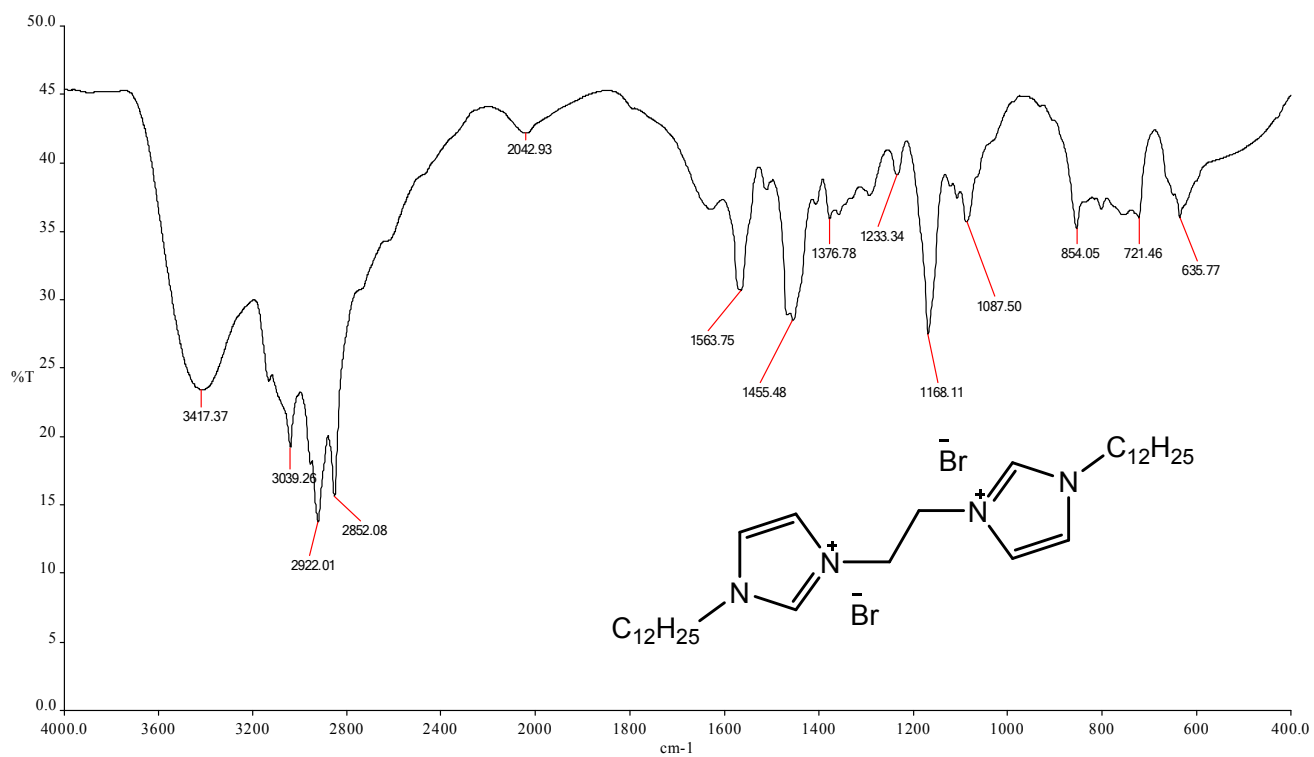

**Fig. S 5:** FT-IR spectrum of GS2.

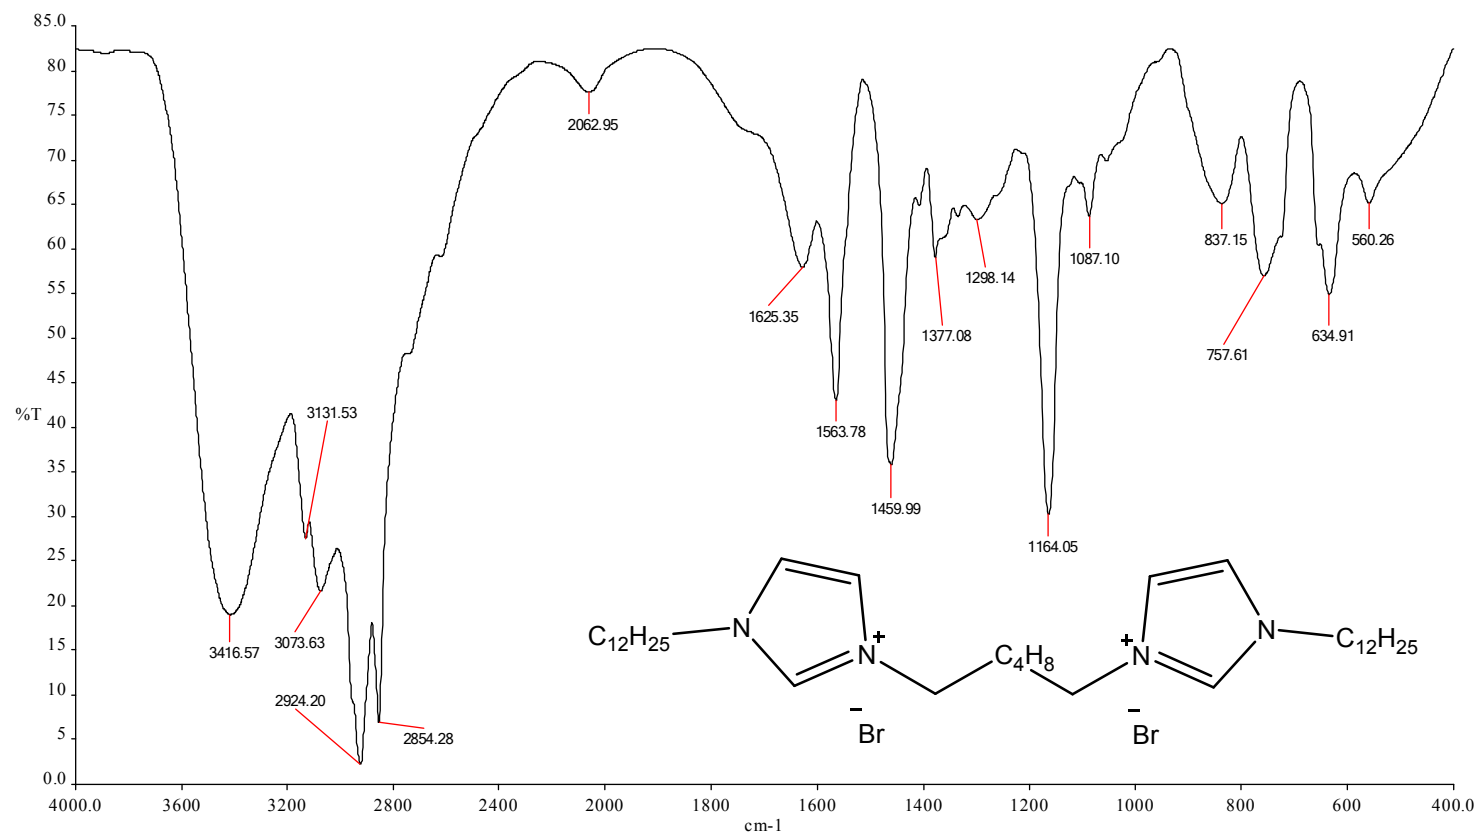

Fig. S 6: FT-IR spectrum of GS6.

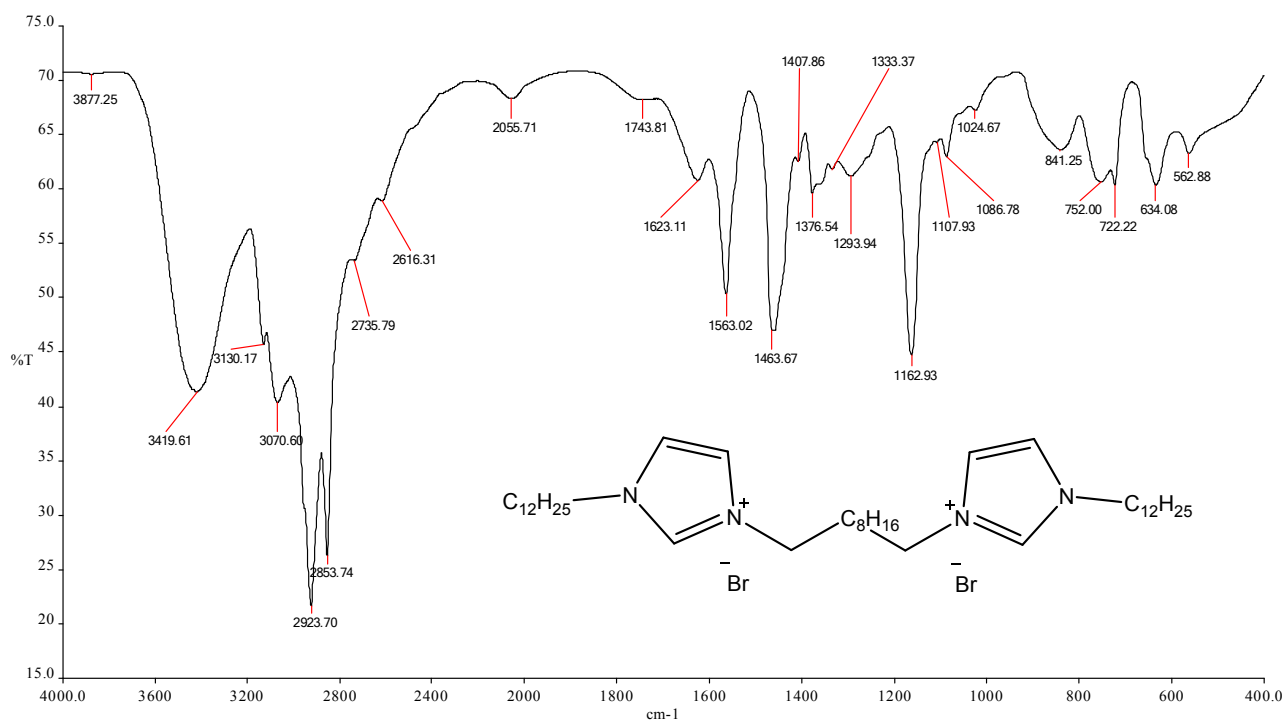

**Fig. S 7:** FT-IR spectrum of GS10.



AymanEsmat-1-CDC13-H1

Archive directory: /export/home/vnmr1/vnmrSYS/data  
Sample directory: D05sm\_test\_12Mar2014-21:34:40  
File: PROTON

Pulse Sequence: s2pul  
Solvent: CDC13  
Temp. 30.0 C / 303.1 K  
Mercury-300BB "NMR300"

Relax. delay 1.000 sec  
Pulse 12.0 degrees  
Acq. time 4.004 sec  
Width 6600.7 Hz  
48 repetitions  
OBSERVE M1, 300.0673638 MHz  
DATA PROCESSING  
Line broadening 0.9 Hz  
FT size 65536  
Total time 36 min, 56 sec  
Date: Oct 20 2016

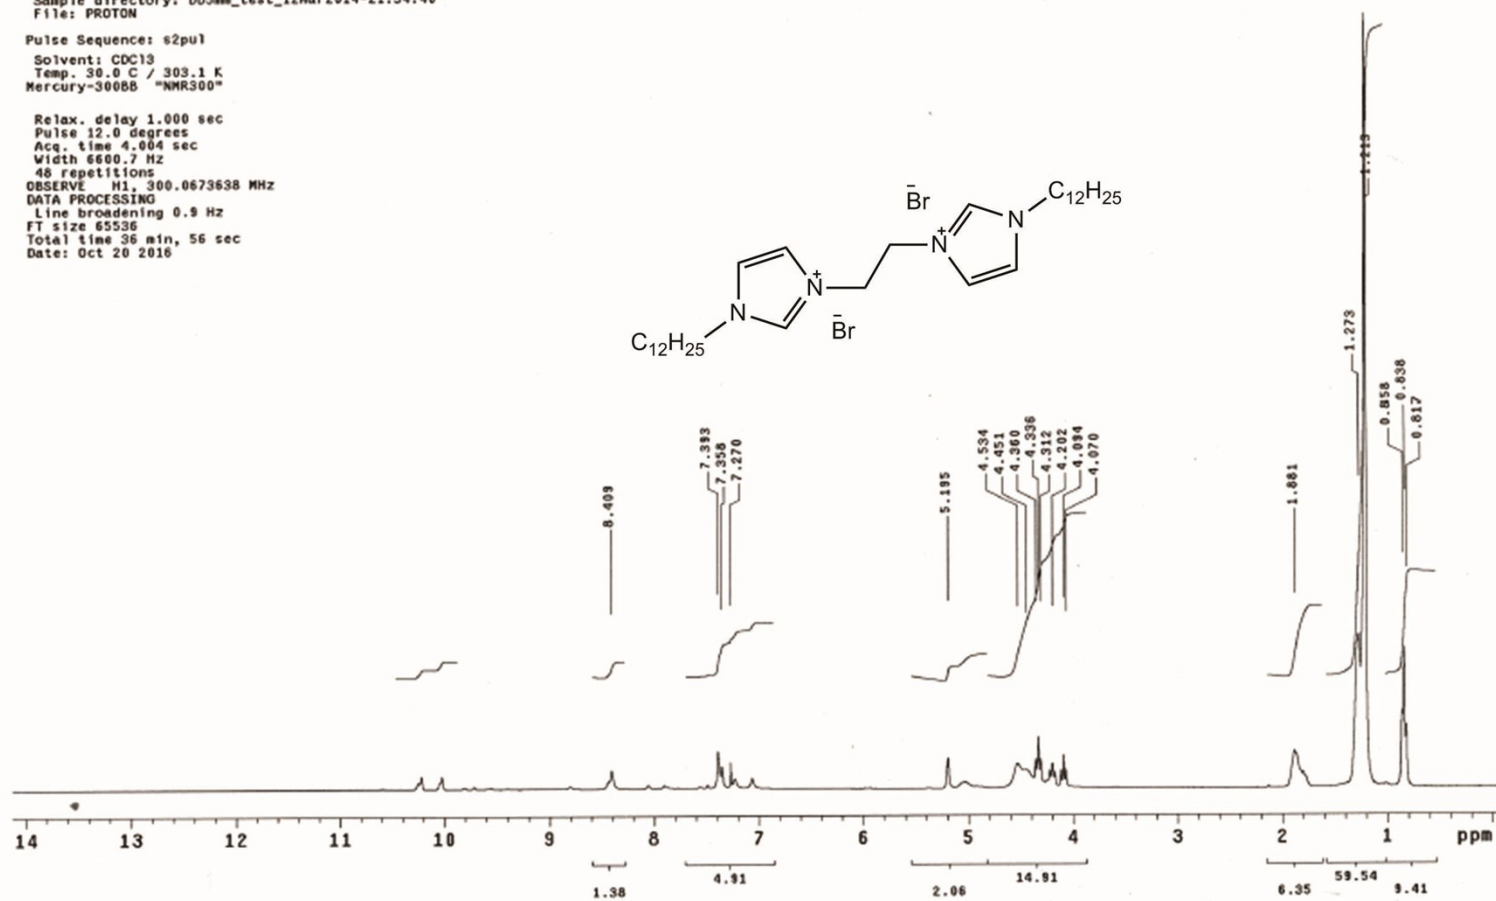

Fig. S 8: <sup>1</sup>H-NMR spectrum of GS2.

GS6

AymanEseat-2-CDC13-H1

Archive directory: /export/home/vnmr1/vnmrsys/data  
Sample directory: D05mm\_test\_12Mar2014-21:34:40  
File: PROTON

Pulse Sequence: s2pu1  
Solvent: CDC13  
Temp. 30.0 C / 303.1 K  
Mercury-300BB "NMR300"

Relax. delay 1.000 sec  
Pulse 12.0 degrees  
Acq. time 4.004 sec  
Width 6600.7 Hz  
56 repetitions  
OBSERVE H1, 300.0673638 MHz  
DATA PROCESSING  
Line broadening 0.9 Hz  
FT size 85536  
Total time 36 min, 56 sec  
Date: Oct 20 2016

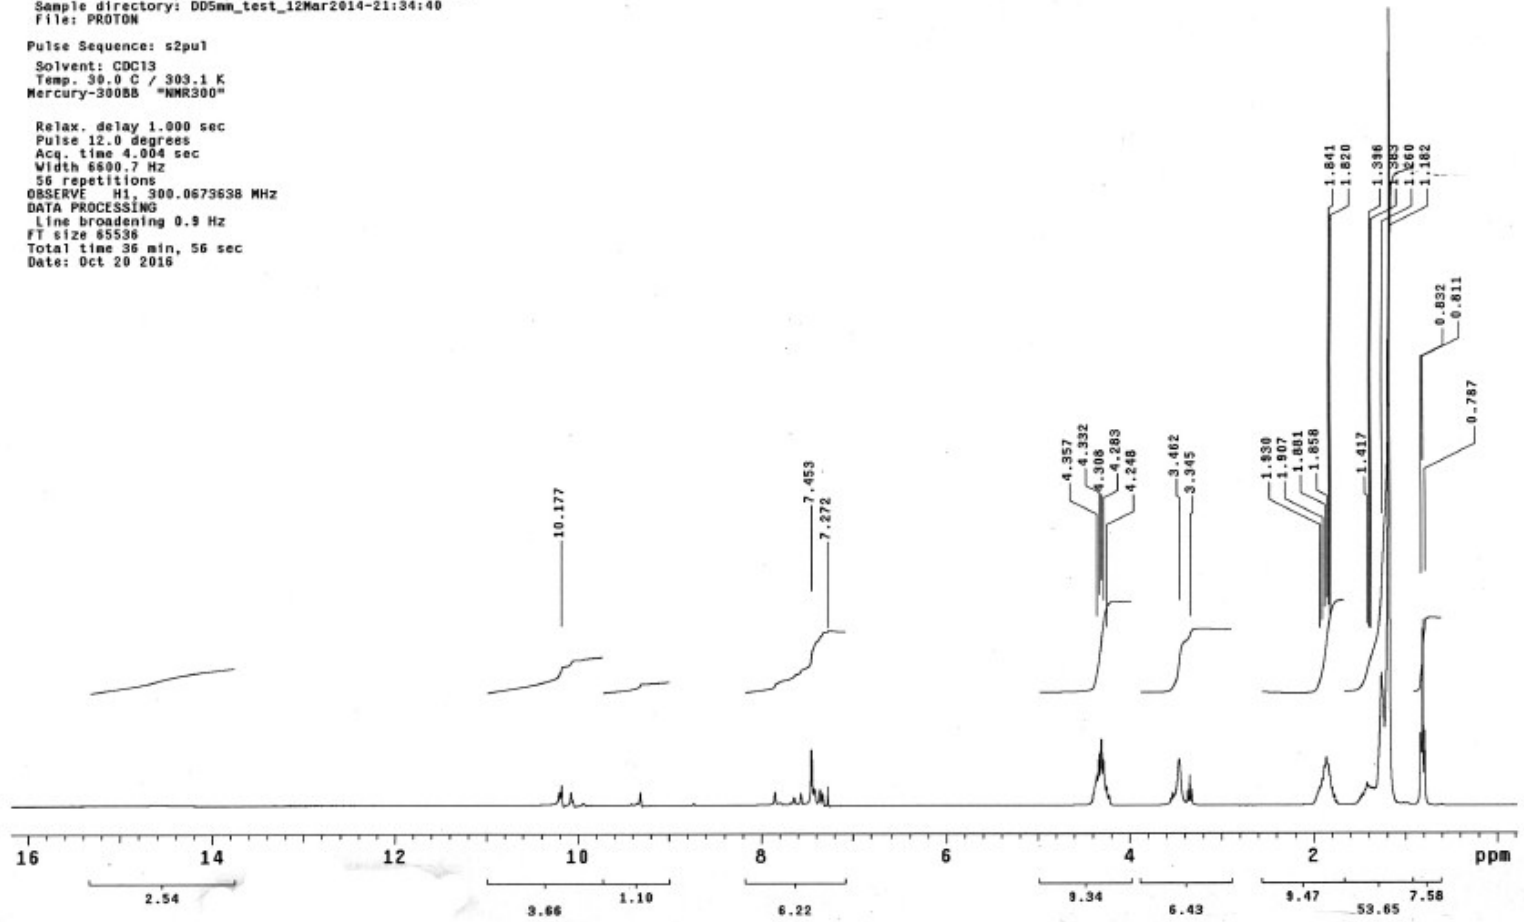

Fig. S 9:  $^1\text{H}$ -NMR spectrum of GS6.

GS10

AymanEsmat-10-CDC13-H1

Archive directory: /export/home/vnmr1/vnmrsys/data  
Sample directory: DDSmm\_test\_12Mar2014-21:34:40  
File: PROTON

Pulse Sequence: s2pu1  
Solvent: CDC13  
Temp. 30.0 C / 303.1 K  
Mercury-300BB "NMR300"

Relax. delay 1.000 sec  
Pulse 12.0 degrees  
Acq. time 4.004 sec  
Width 6600.7 Hz  
80 repetitions  
OBSERVE H1, 300.0673638 MHz  
DATA PROCESSING  
Line broadening 0.9 Hz  
FT size 65536  
Total time 36 min, 56 sec  
Date: Oct 20 2016

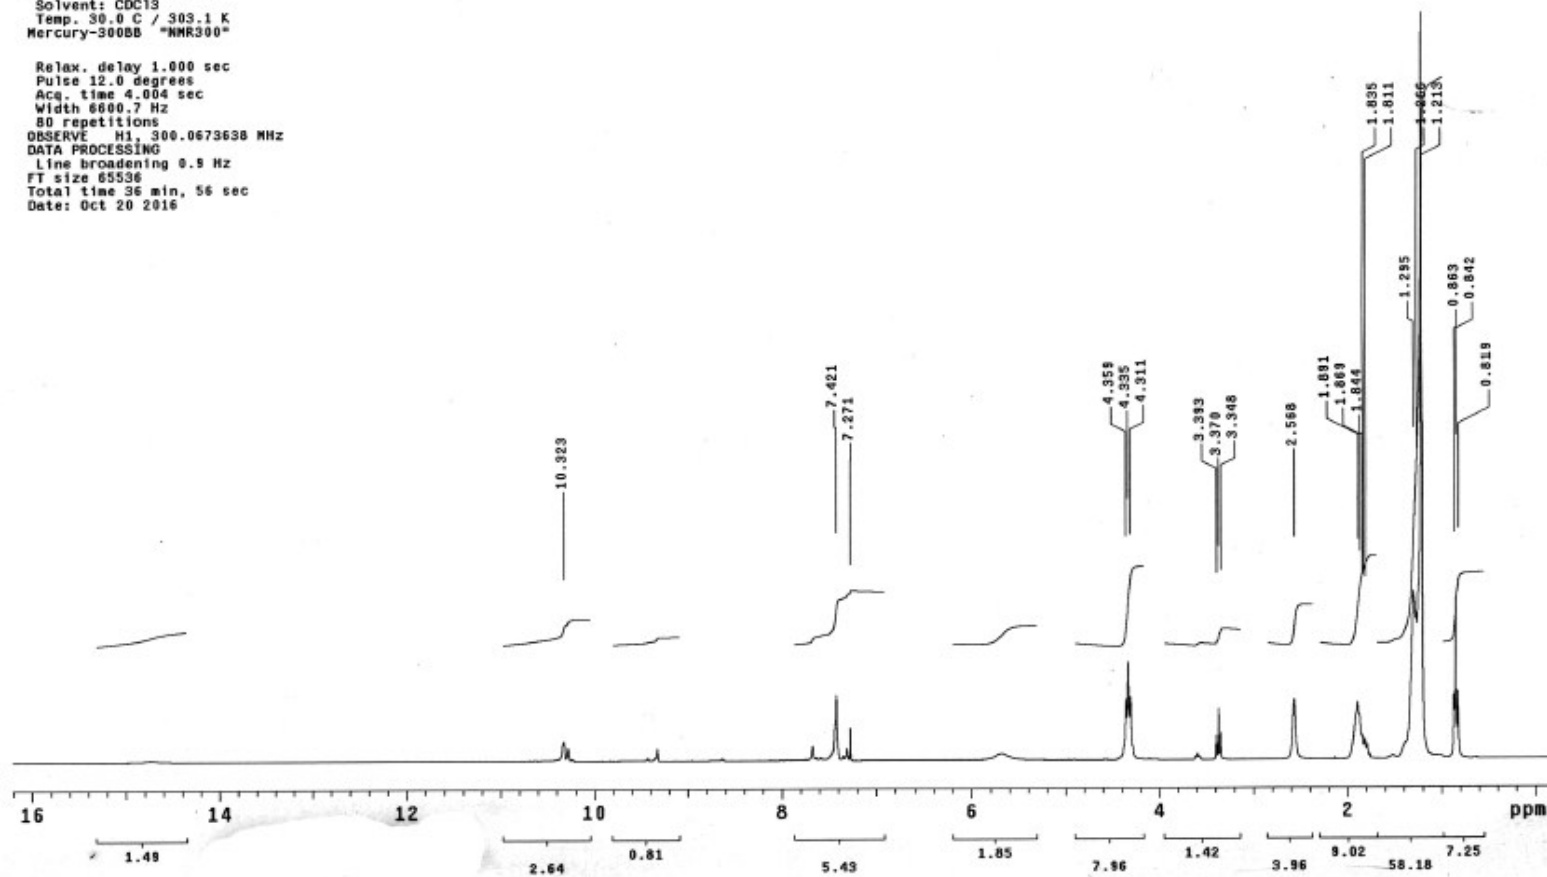

Fig. S 10:  $^1\text{H}$ -NMR spectrum of GS10.

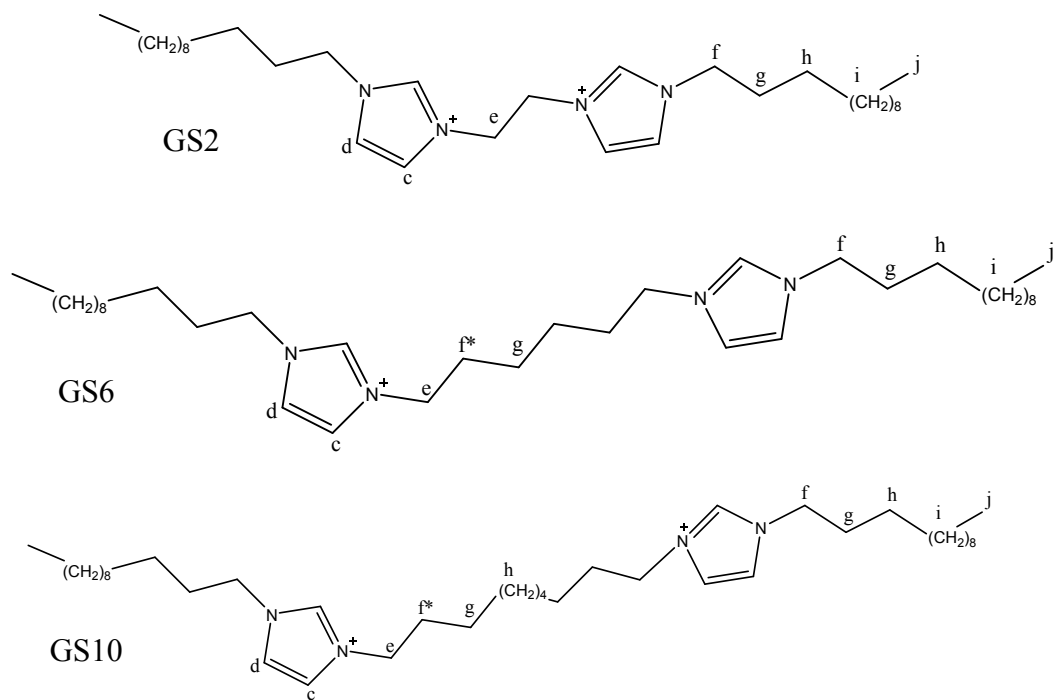

**Fig. S 11:** Different types of protons in Gemini surfactants.

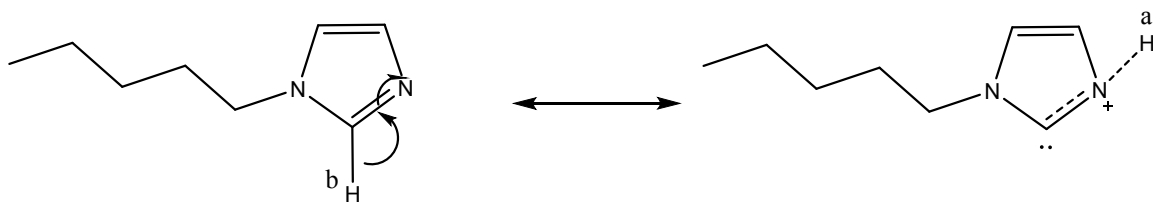

**Scheme S 1:** Carbene proton and NH<sup>+</sup> tautomerism for the intermediate compound.

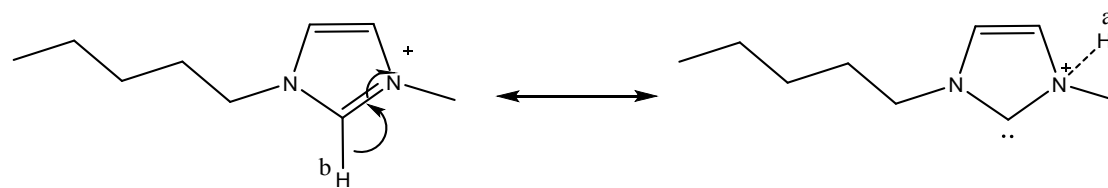

**Scheme S 2:** Carbene proton and  $\text{NH}^+$  tautomerism for the Gemini compounds.

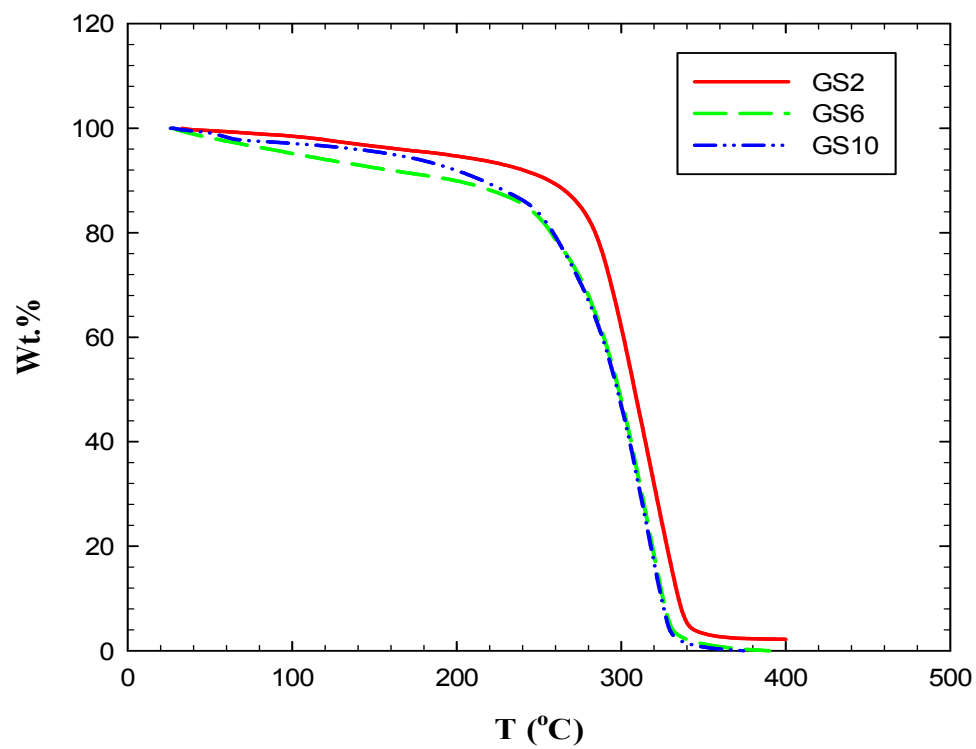

**Fig. S 12:** TGA curves for the synthesized Gemini surfactants.

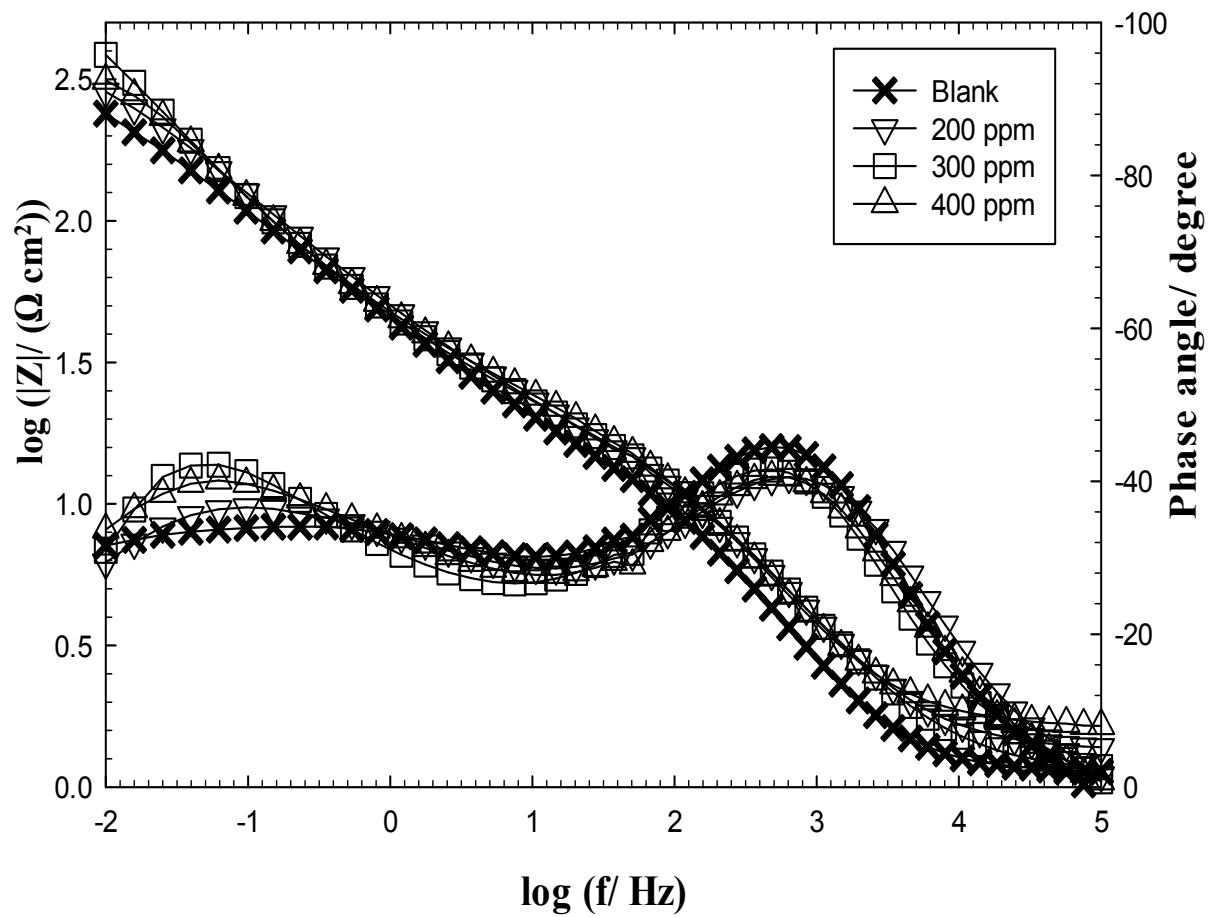

**Fig. S 13:** Bode plot for carbon steel in formation water as a function of GS6 concentration at 293 K.

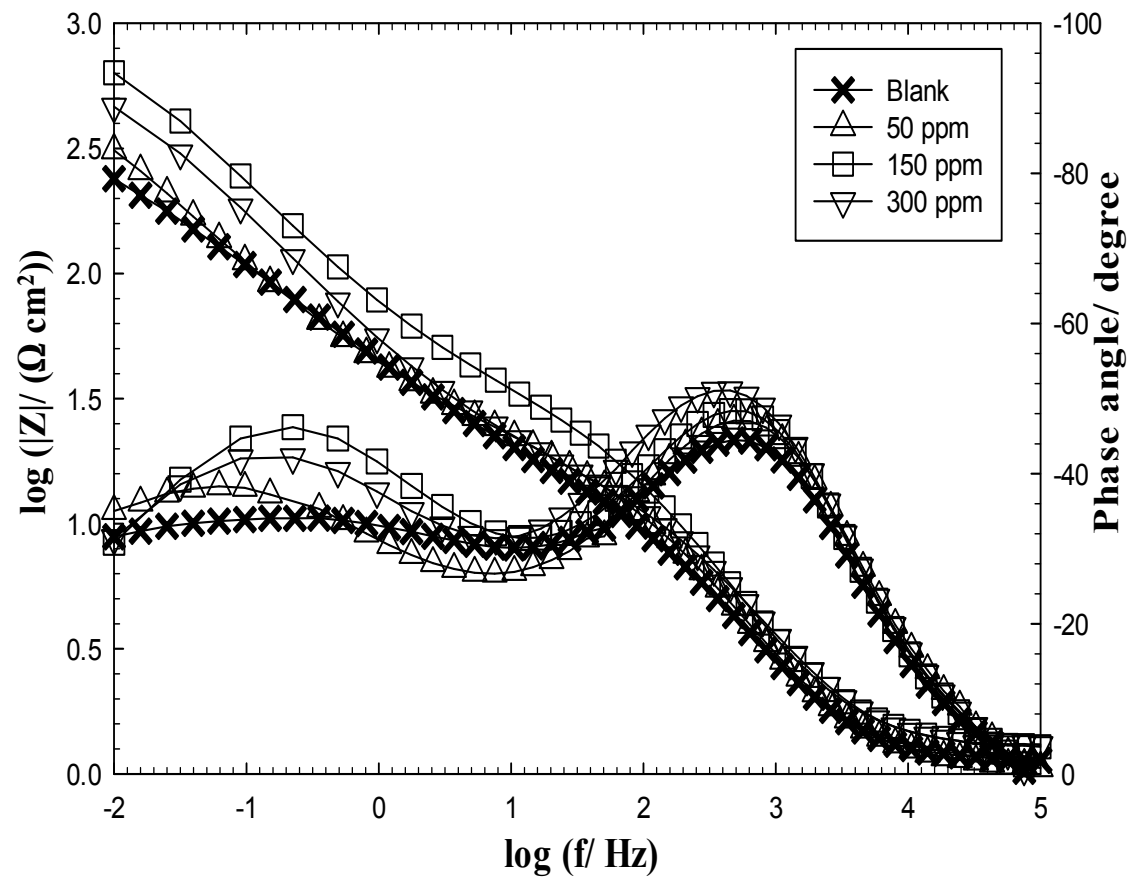

**Fig. S 14:** Bode plot for carbon steel in formation water as a function of GS10 concentration at 293 K.

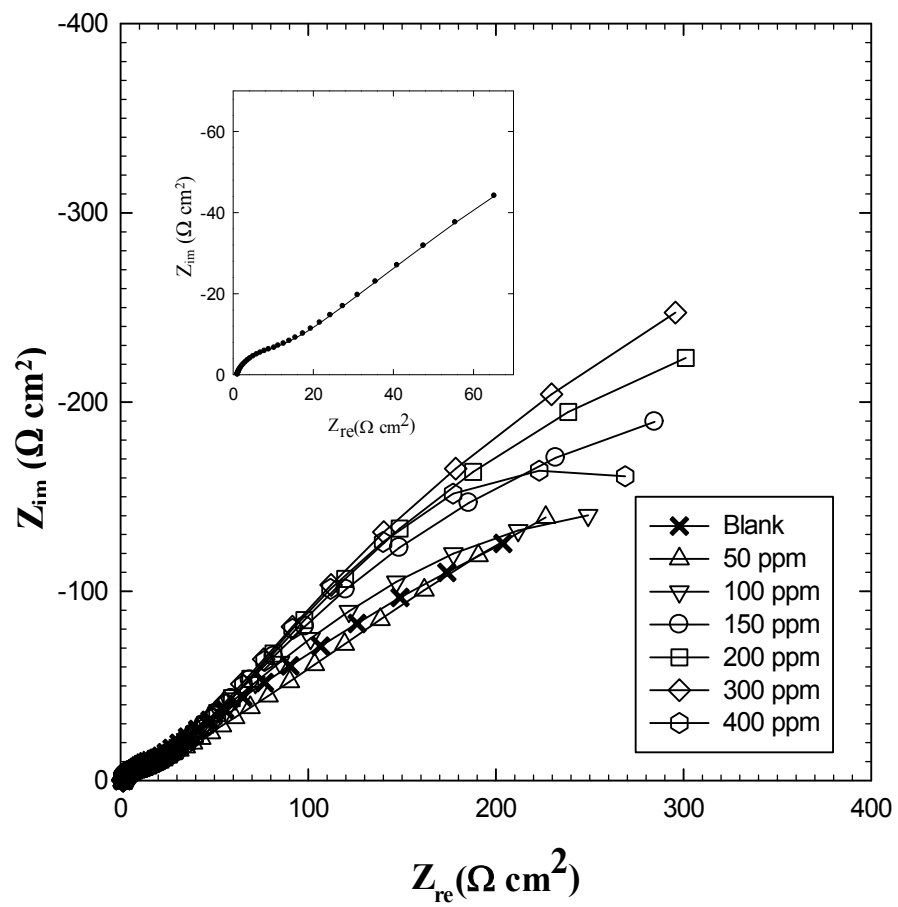

**Fig. S 15:** Nyquist plot for carbon steel in formation water as a function of GS6 concentration at 293 K. Inset: the Nyquist plot for CS in blank formation water.



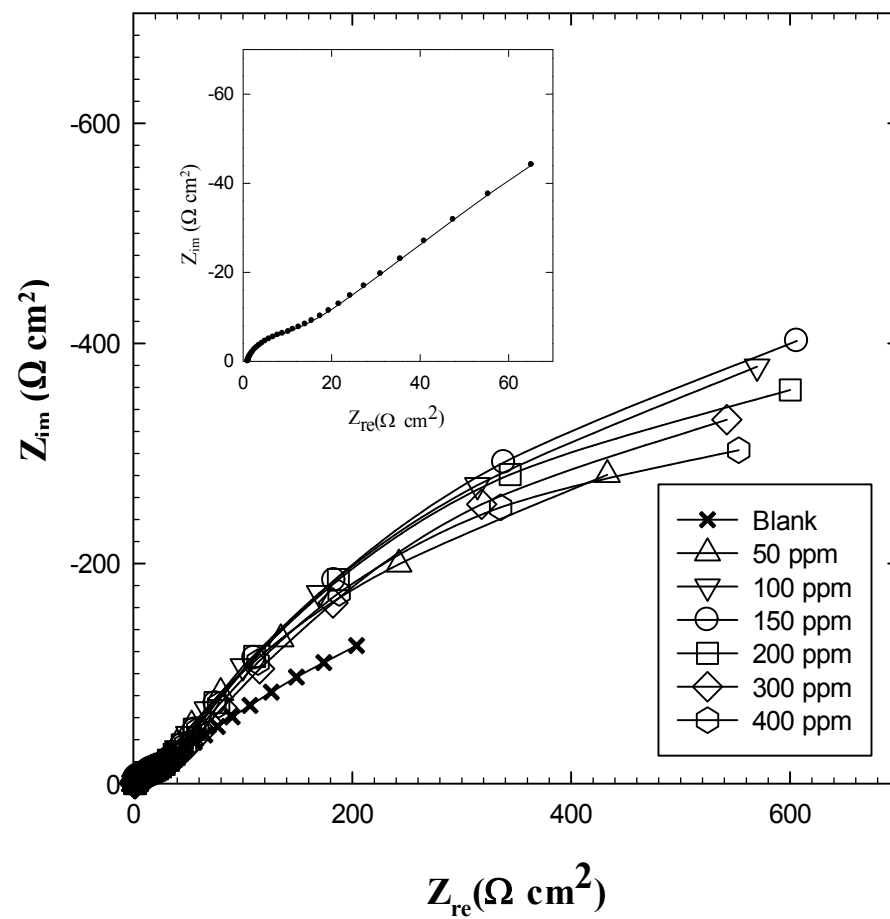

**Fig. S 16:** Nyquist plot for carbon steel in formation water as a function of GS10 concentration at 293 K. Inset: the Nyquist plot for CS in blank formation water.

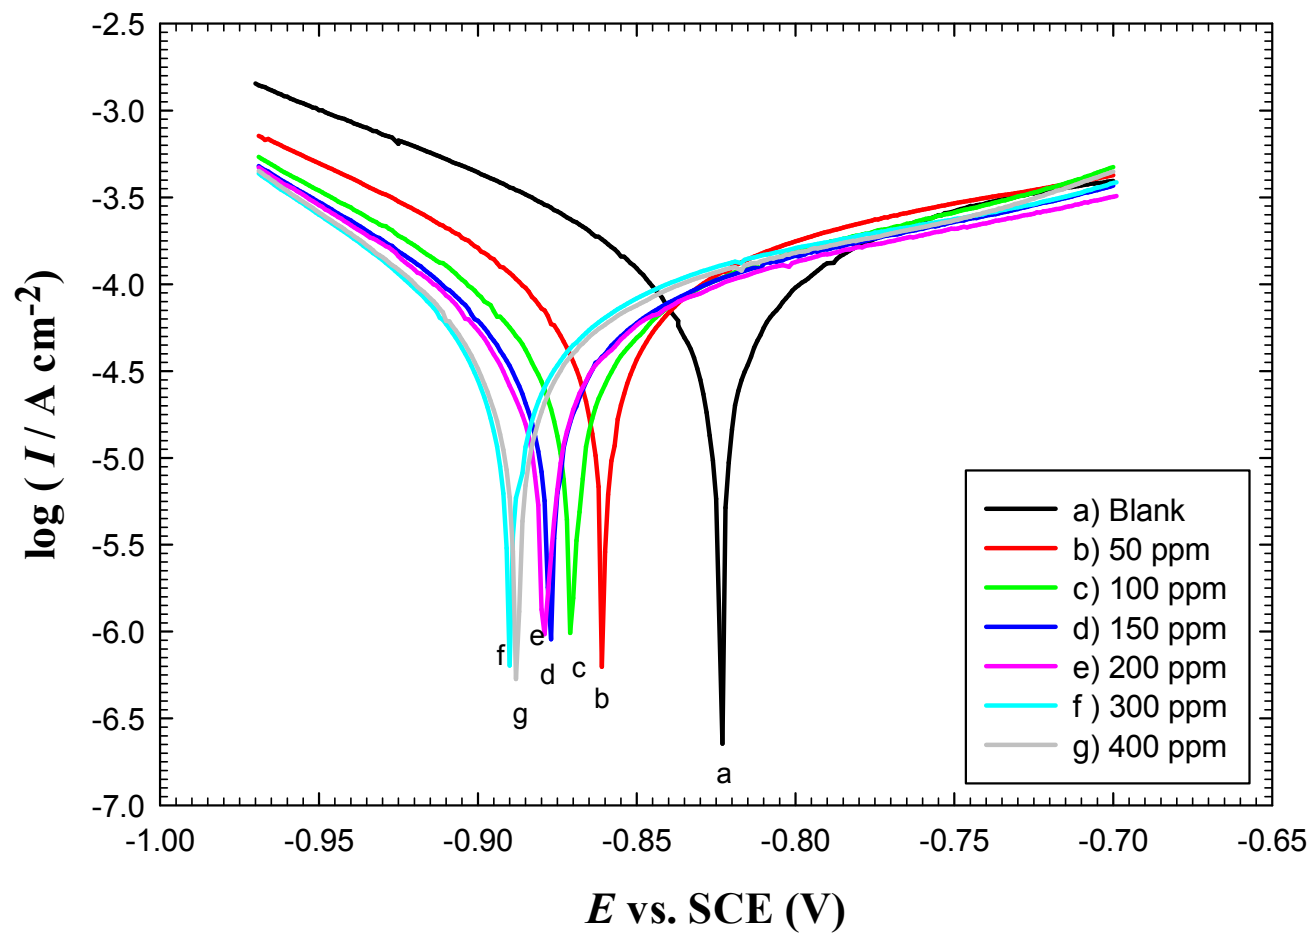

Fig. S 17: Polarization curves for carbon steel in formation water as a function of GS6 concentration at 293 K.

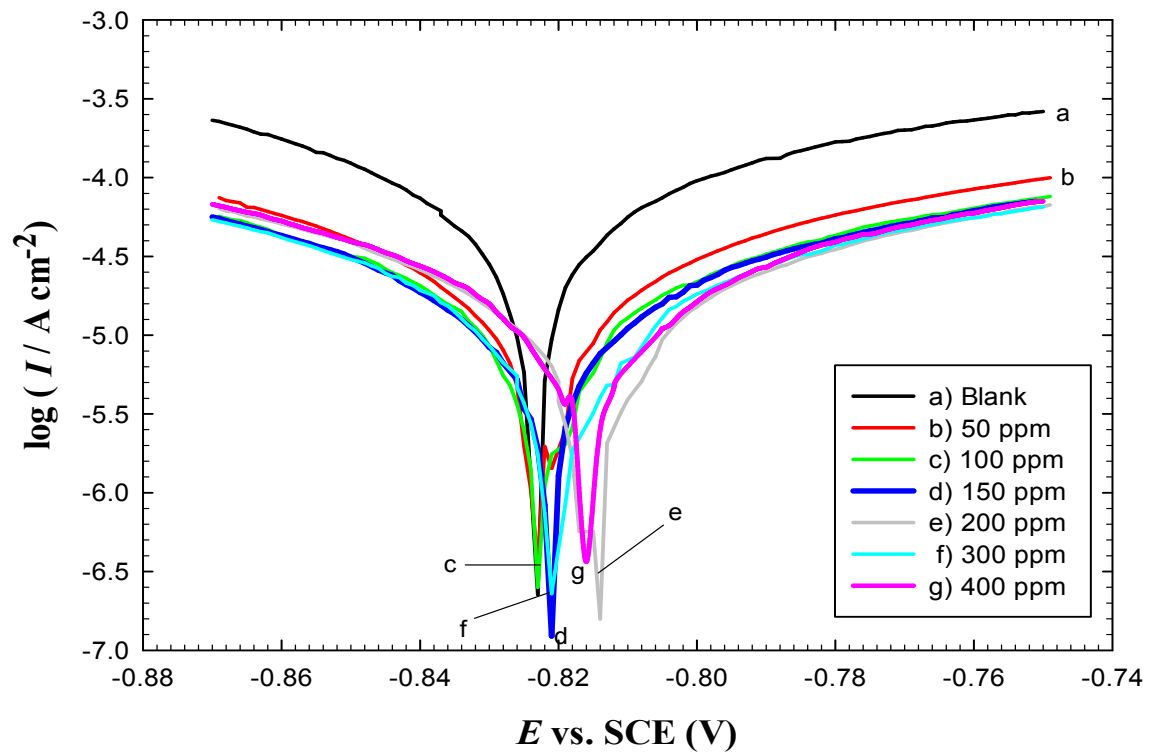

**Fig. S 18:** Polarization curves for carbon steel in formation water as a function of GS10 concentration at 293 K.

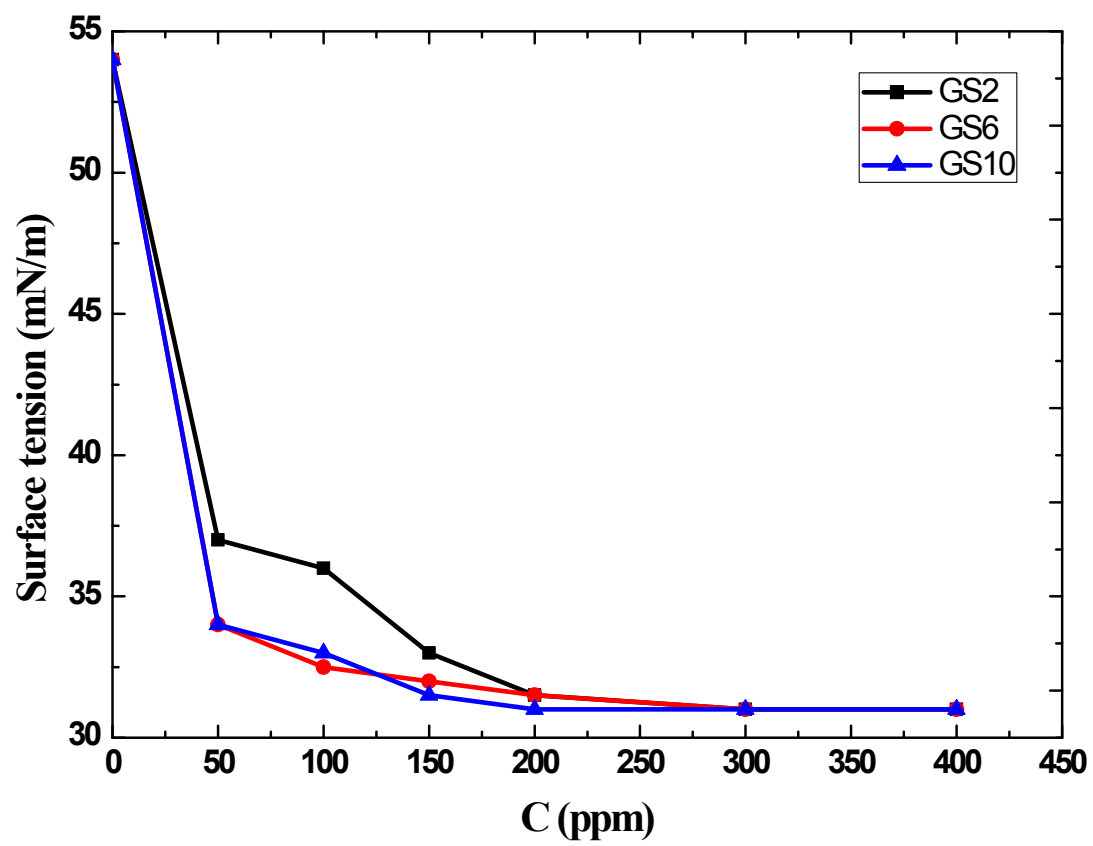

Fig. S 19: Variation of the surface tension with concentrations of GS2, GS6 and GS10.

**Table S 1:** FT-IR absorption bands ( $\nu/\text{cm}^{-1}$ ) for the intermediate, GS2, GS6 and GS10.

| Assignment <sup>78</sup>                 | N-H  | Aromatic C - H | Aliphatic C - H | Combination | Aromatic   | C - Br |     |
|------------------------------------------|------|----------------|-----------------|-------------|------------|--------|-----|
|                                          |      |                |                 | N-H         | C=C or C=N |        |     |
| Intermediate                             | 3407 | 3099           | 2923 - 2854     | 2028        | 1564       | .....  |     |
| Absorption bands<br>( $\text{cm}^{-1}$ ) | GS2  | 3417           | 3039            | 2922 - 2852 | 2042       | 1563   | 636 |
|                                          | GS6  | 3416           | 3073            | 2924 - 2854 | 2062       | 1625   | 635 |
|                                          | GS10 | 3419           | 3070            | 2923 - 2853 | 2055       | 1623   | 635 |

**Table S 2:** Chemical shifts ( $\delta/\text{ppm}$ ) for the intermediate. Notes: spin multiplicity; s = singlet, d = Doublet, t = Triplet, m = Multiplet.

| Protons | a      | b     | c     | d     | e     | f, f' | g     | h     | i     |
|---------|--------|-------|-------|-------|-------|-------|-------|-------|-------|
| Signals | 10.246 | 7.436 | 6.969 | 6.843 | 4.274 | 3.864 | 1.703 | 1.187 | 0.812 |
|         | (s)    | (d)   | (d)   | (d)   | (t)   | (m)   | (m)   | (m)   | (t)   |

**Table S 3:** Chemical shifts ( $\delta/\text{ppm}$ ) for GS2, GS6 and GS10. Notes: spin multiplicity; s = singlet, d = Doublet, t = Triplet, m = Multiplet.

| Compound | a      | b     | c     | d     | e     | f, f'     | g     | h     | i     | J     |
|----------|--------|-------|-------|-------|-------|-----------|-------|-------|-------|-------|
| GS2      | 10.168 | 8.409 | 7.376 | 7.270 | 4.534 | 4.202     | 4.094 | 1.881 | 1.273 | 0.838 |
|          | (s)    | (s)   | (d)   | (d)   | (t)   | (t)       | (m)   | (m)   | (m)   | (t)   |
| GS6      | 10.177 | 9.375 | 7.453 | 7.272 | 4.308 | 4.248 (t) | 3.462 | 1.858 | 1.383 | 0.811 |
|          | (s)    | (s)   | (d)   | (d)   | (t)   | 4.283 (m) | (m)   | (m)   | (m)   | (t)   |
| GS10     | 10.323 | 9.274 | 7.421 | 7.271 | 4.335 | 3.370 (t) | 2.568 | 1.844 | 1.235 | 0.842 |
|          | (s)    | (s)   | (d)   | (d)   | (t)   | 3.393 (m) | (m)   | (m)   | (m)   | (t)   |

**Table S 4:** Elemental analysis of compounds GS2, GS6 and GS10.

| Compound    | Element |       |       |      |       |      |       |       |
|-------------|---------|-------|-------|------|-------|------|-------|-------|
|             | C%      |       | H%    |      | N%    |      | Br%   |       |
|             | Calc.   | Obs.  | Calc. | Obs. | Calc. | Obs. | Calc. | Obs.  |
| <b>GS2</b>  | 58.18   | 57.98 | 9.15  | 9.24 | 8.48  | 8.37 | 24.19 | 24.41 |
| <b>GS6</b>  | 60.33   | 60.57 | 9.56  | 9.47 | 7.82  | 7.67 | 22.30 | 22.44 |
| <b>GS10</b> | 62.16   | 61.79 | 9.91  | 9.99 | 7.25  | 7.49 | 20.68 | 20.73 |
